# Supplementary material for: Bioreductive molecular probe: fluorescence signalling upon reduction of an azo group
Source: Royal Society of Chemistry journal article supplement (doi:10.1039/c0nj00849d), 2011-01-01
Supplement: c0nj00849d.pdf [file c0nj00849d.pdf]

## *Supplementary Information*

### **Bioreductive molecular probe: fluorescence signalling upon reduction of an azo group**

**Manikandan Kadirvel ¶, Nicholas J. W. Rattray ¶, Ramkumar Rajendran, Waleed A. Zalloum, Abdul Gbaj, Constantinos Demonacos, Elena V. Bichenkova\* and Sally Freeman\***

**School of Pharmacy and Pharmaceutical Sciences, University of Manchester,  
Oxford Road, Manchester M13 9PT, United Kingdom**

¶ Equal contribution to this research.

\* Corresponding author.

Tel.: +44 161 275 2366; fax: +44 161 275 2396

*E-mail address:* sally.freeman@manchester.ac.uk (synthesis)

elena.bichenkova@manchester.ac.uk (fluorescence & structural studies)

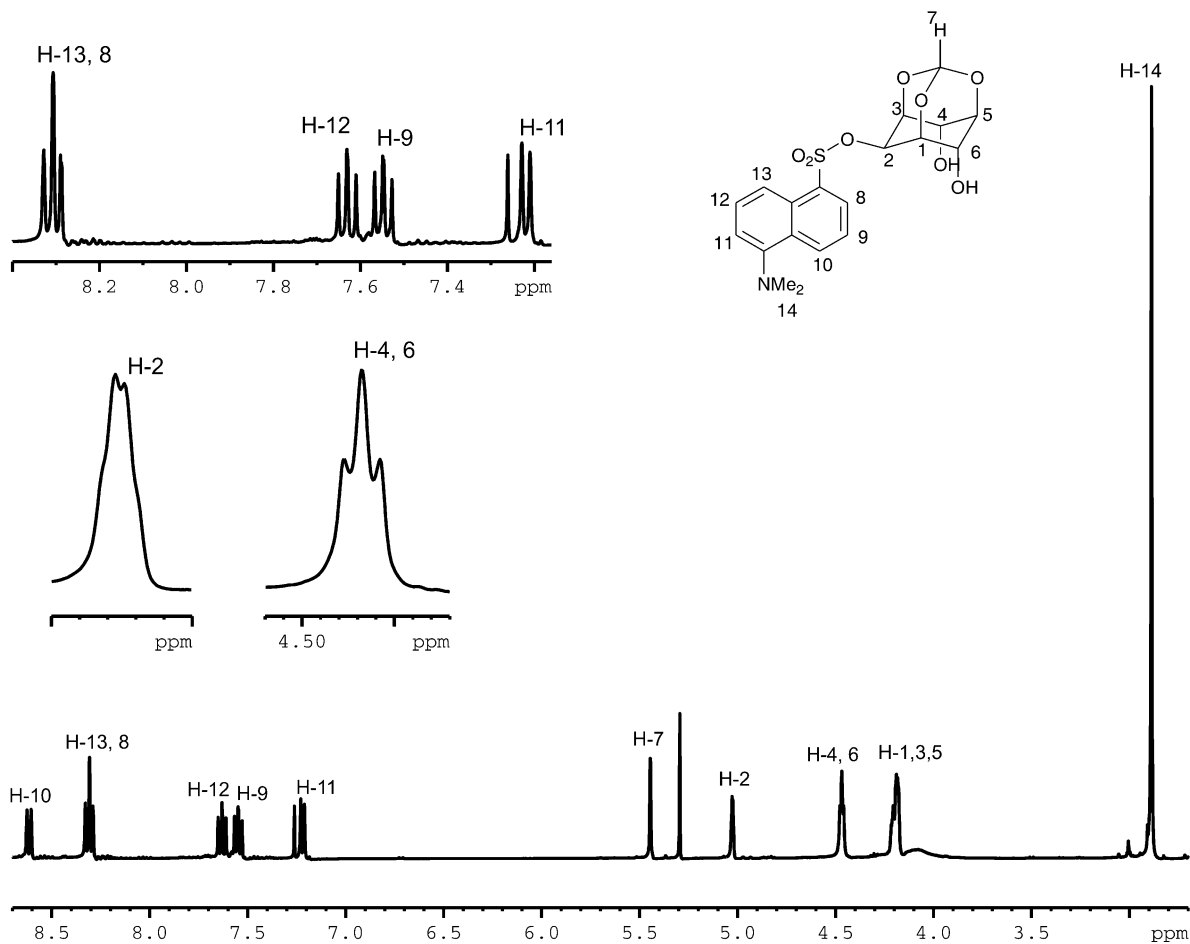

**Figure SI 1:** <sup>1</sup>H NMR spectrum (400 MHz) of 2-O-dansyl-myoinositol-1,3,5-orthoformate (**6**) in CDCl<sub>3</sub>. The peak at ~5.3 ppm is DCM, the solvent used for recrystallisation. The chemical shift data and coupling constant are reported in the experimental.

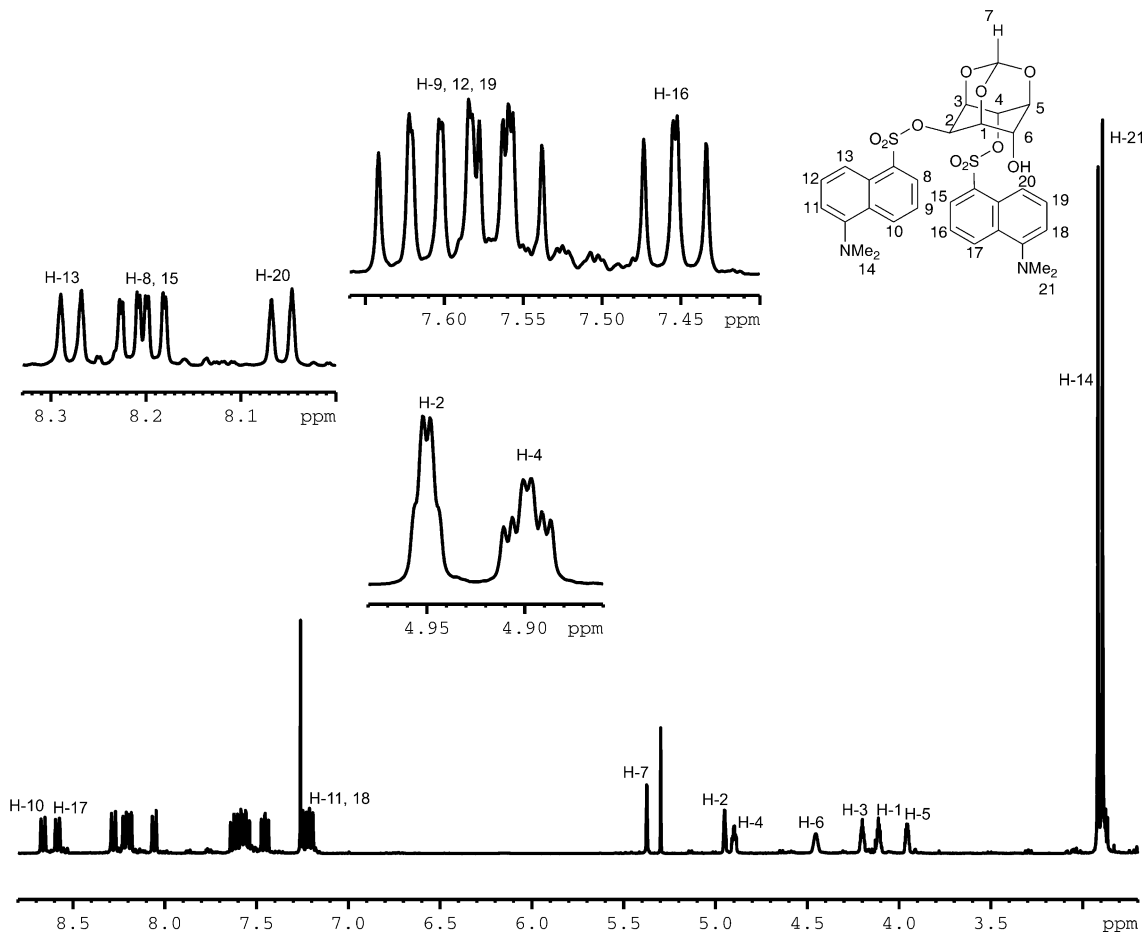

**Figure SI 2:**  $^1\text{H}$  NMR spectrum (400 MHz) of 2,4-O-bisdansyl-myoinositol-1,3,5-orthoformate (**8**) in  $\text{CDCl}_3$ . The peak at  $\sim 5.3$  ppm is DCM, the solvent used for column chromatography. The chemical shift data and coupling constant are reported in the experimental.

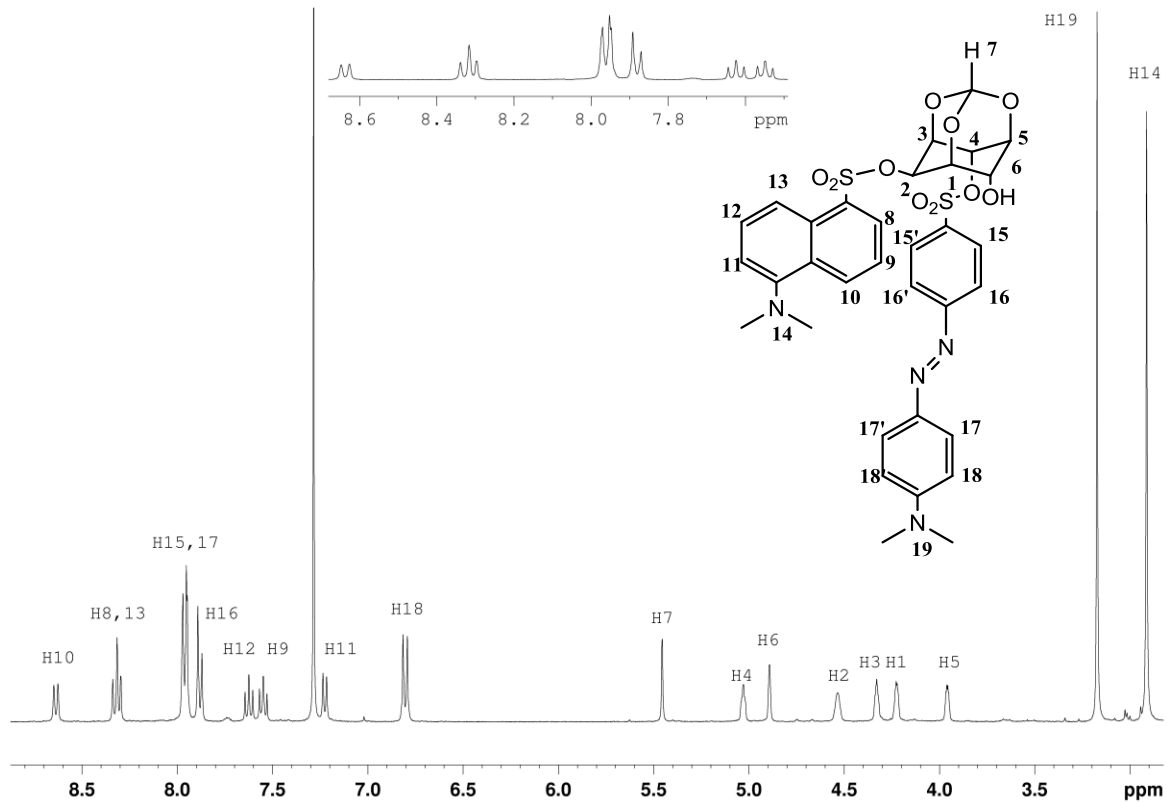

**Figure SI 3:** <sup>1</sup>H NMR (400 MHz) spectrum of 4-*O*-dabsyl-2-*O*-dansyl-*myo*-inositol-1,3,5-orthoformate (**4**) in CDCl<sub>3</sub>. The chemical shift data and coupling constant are reported in the experimental.

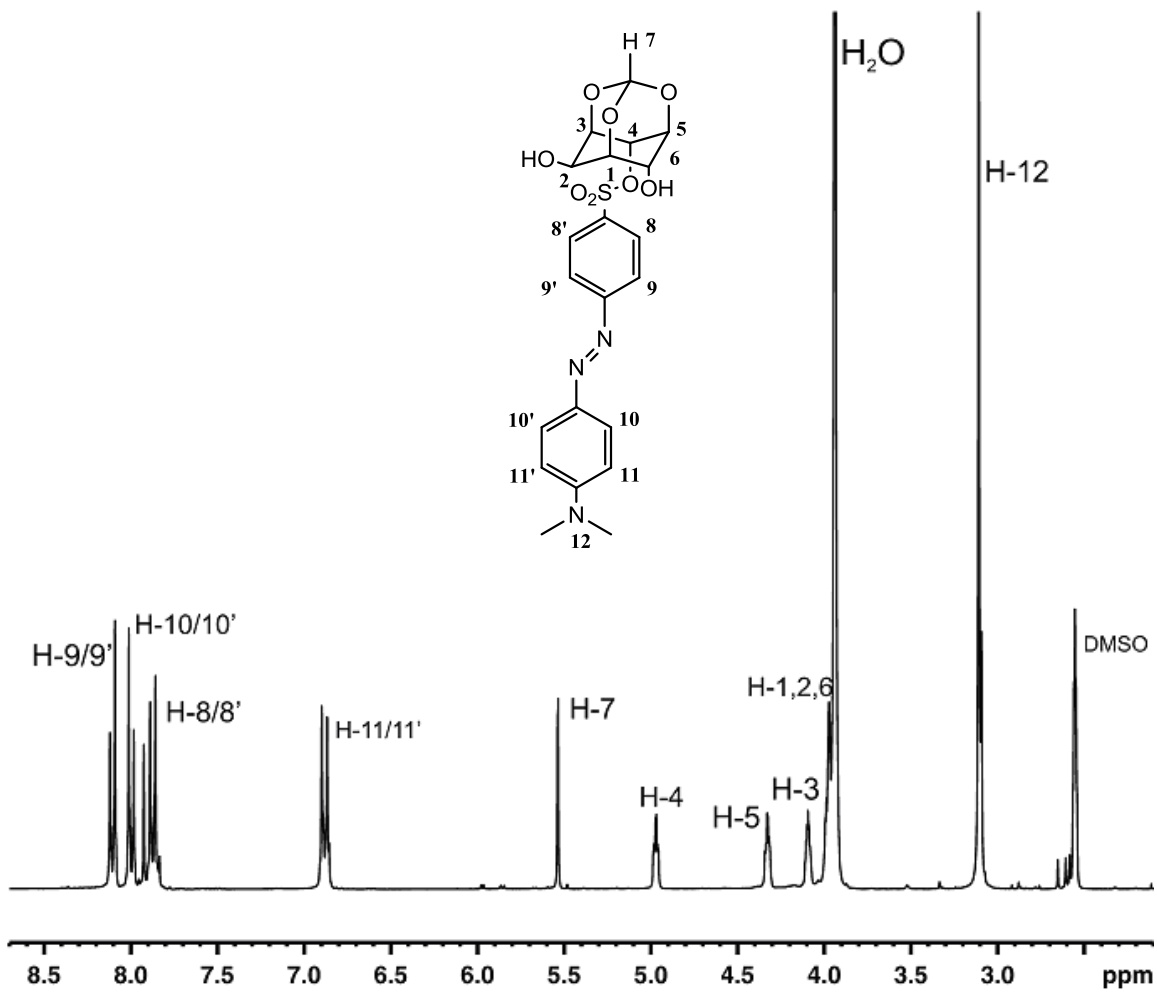

**Figure SI 4:** <sup>1</sup>H NMR (500 MHz) spectrum of 4-*O*-dabsyl-*myo*-inositol-1,3,5-orthoformate (**9**) in DMSO-d<sub>6</sub>/D<sub>2</sub>O.

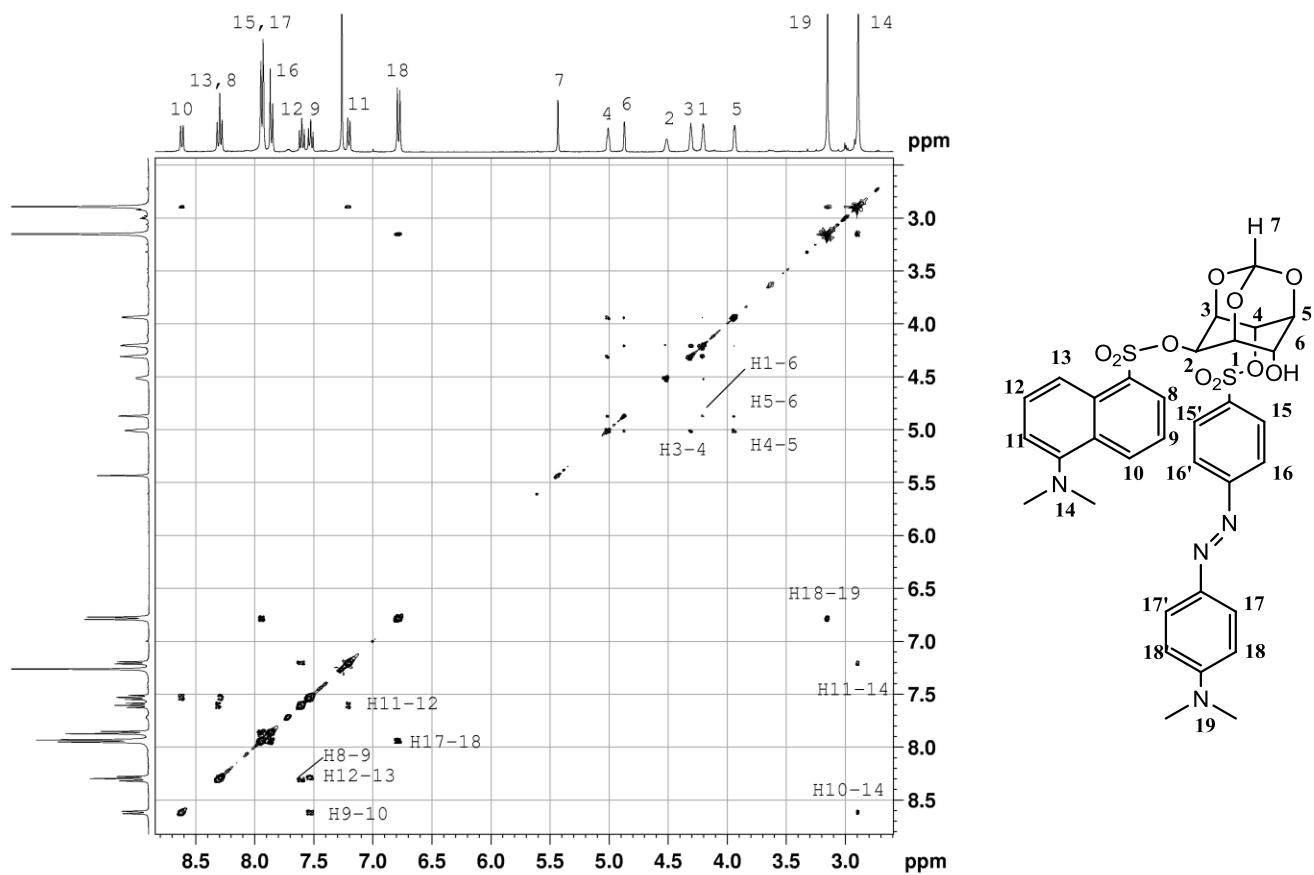

**Figure S15**  $^1\text{H}$ - $^1\text{H}$  NOESY (400 MHz) spectrum of 2-dansyl-4-*O*-dabsyl-*myo*-inositol-1,3,5-orthoformate (**4**) in  $\text{CDCl}_3$ .

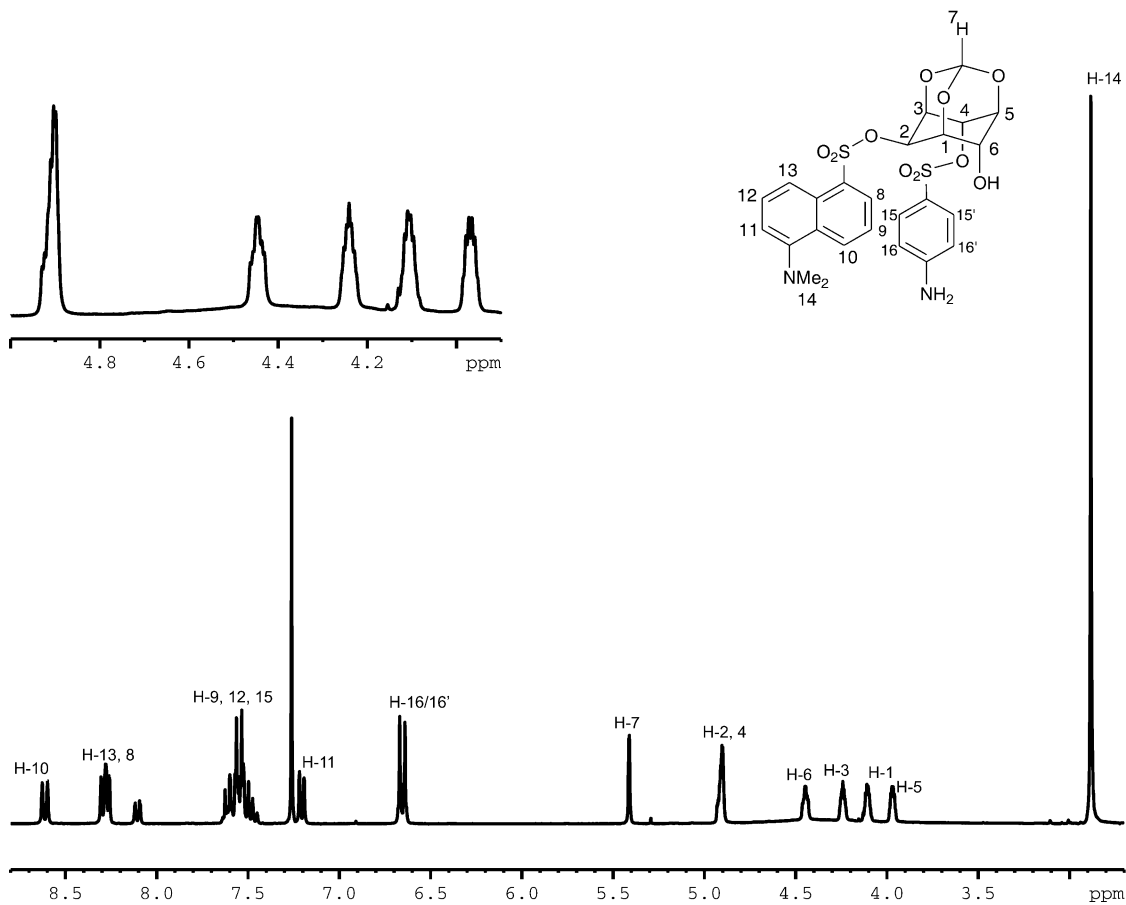

**Figure SI 6:** <sup>1</sup>H NMR (400 MHz) spectrum of 4-*O*-(4-aminobenzene)-sulfonyl-2-*O*-dansyl-*myo*-inositol-1,3,5-orthoformate (**5**) in CDCl<sub>3</sub>. The impurity at  $\sim\delta_{\text{H}}$  8.09 (J 8.5 Hz) is attributed to the decomposition product, 4-aminobenzenesulfonic acid. The chemical shift data and coupling constant are reported in the experimental.

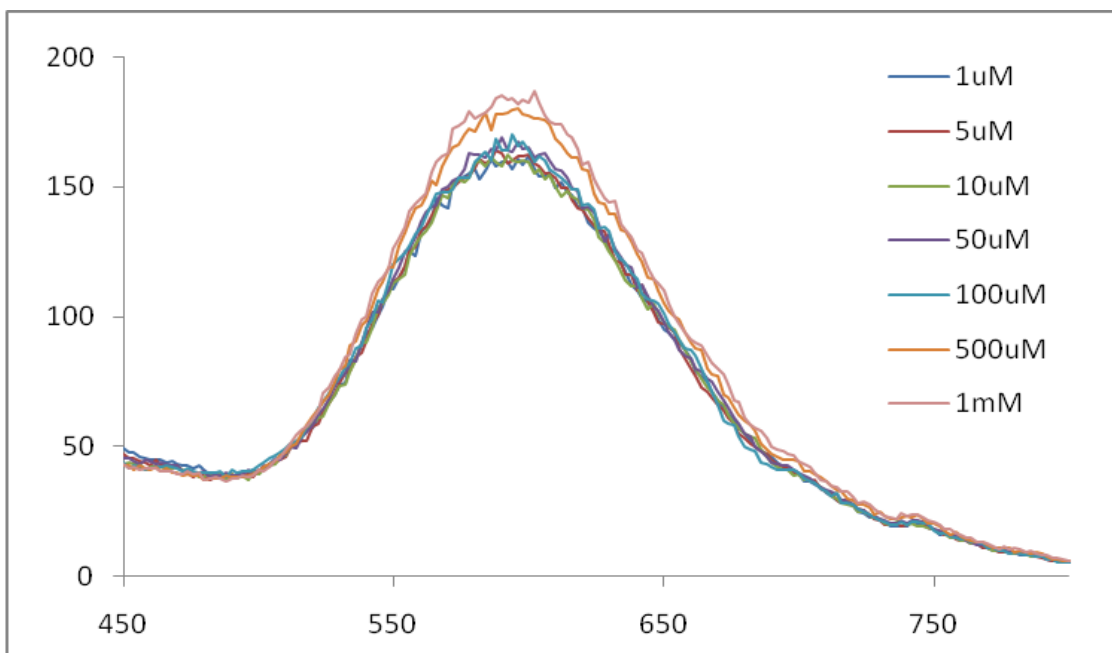

**Fig SI 7:** Emission spectra of 10 μM 2-*O*-dansyl-*myo*-inositol-1,3,5-orthoformate (**6**) titrated against varying concentrations of 4-aminobenzene sulfonic acid.



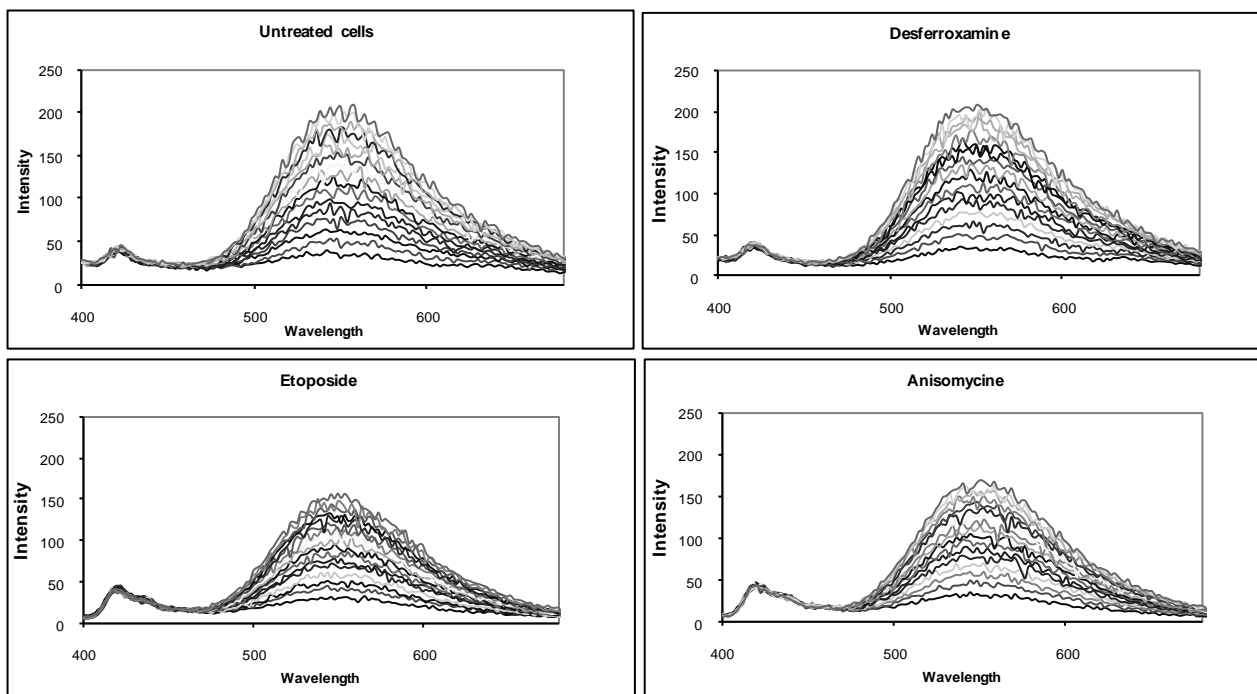

**Figure SI 8:** Fluorescence study of azo probe (**4**) incubated with Human U2OS osteosarcoma cells. An increase in fluorescence is noted with each line representing a fluorescence scan taken every hour over a 16-hour period, summarized as a time course in **Fig. 5**.
